# Supplementary material for: Lassa and Marburg viruses elicit distinct host transcriptional responses early after infection
Source: PubMed Central journal article supplement (PMC4232721; doi:10.1186/1471-2164-15-960), 2014-11-06

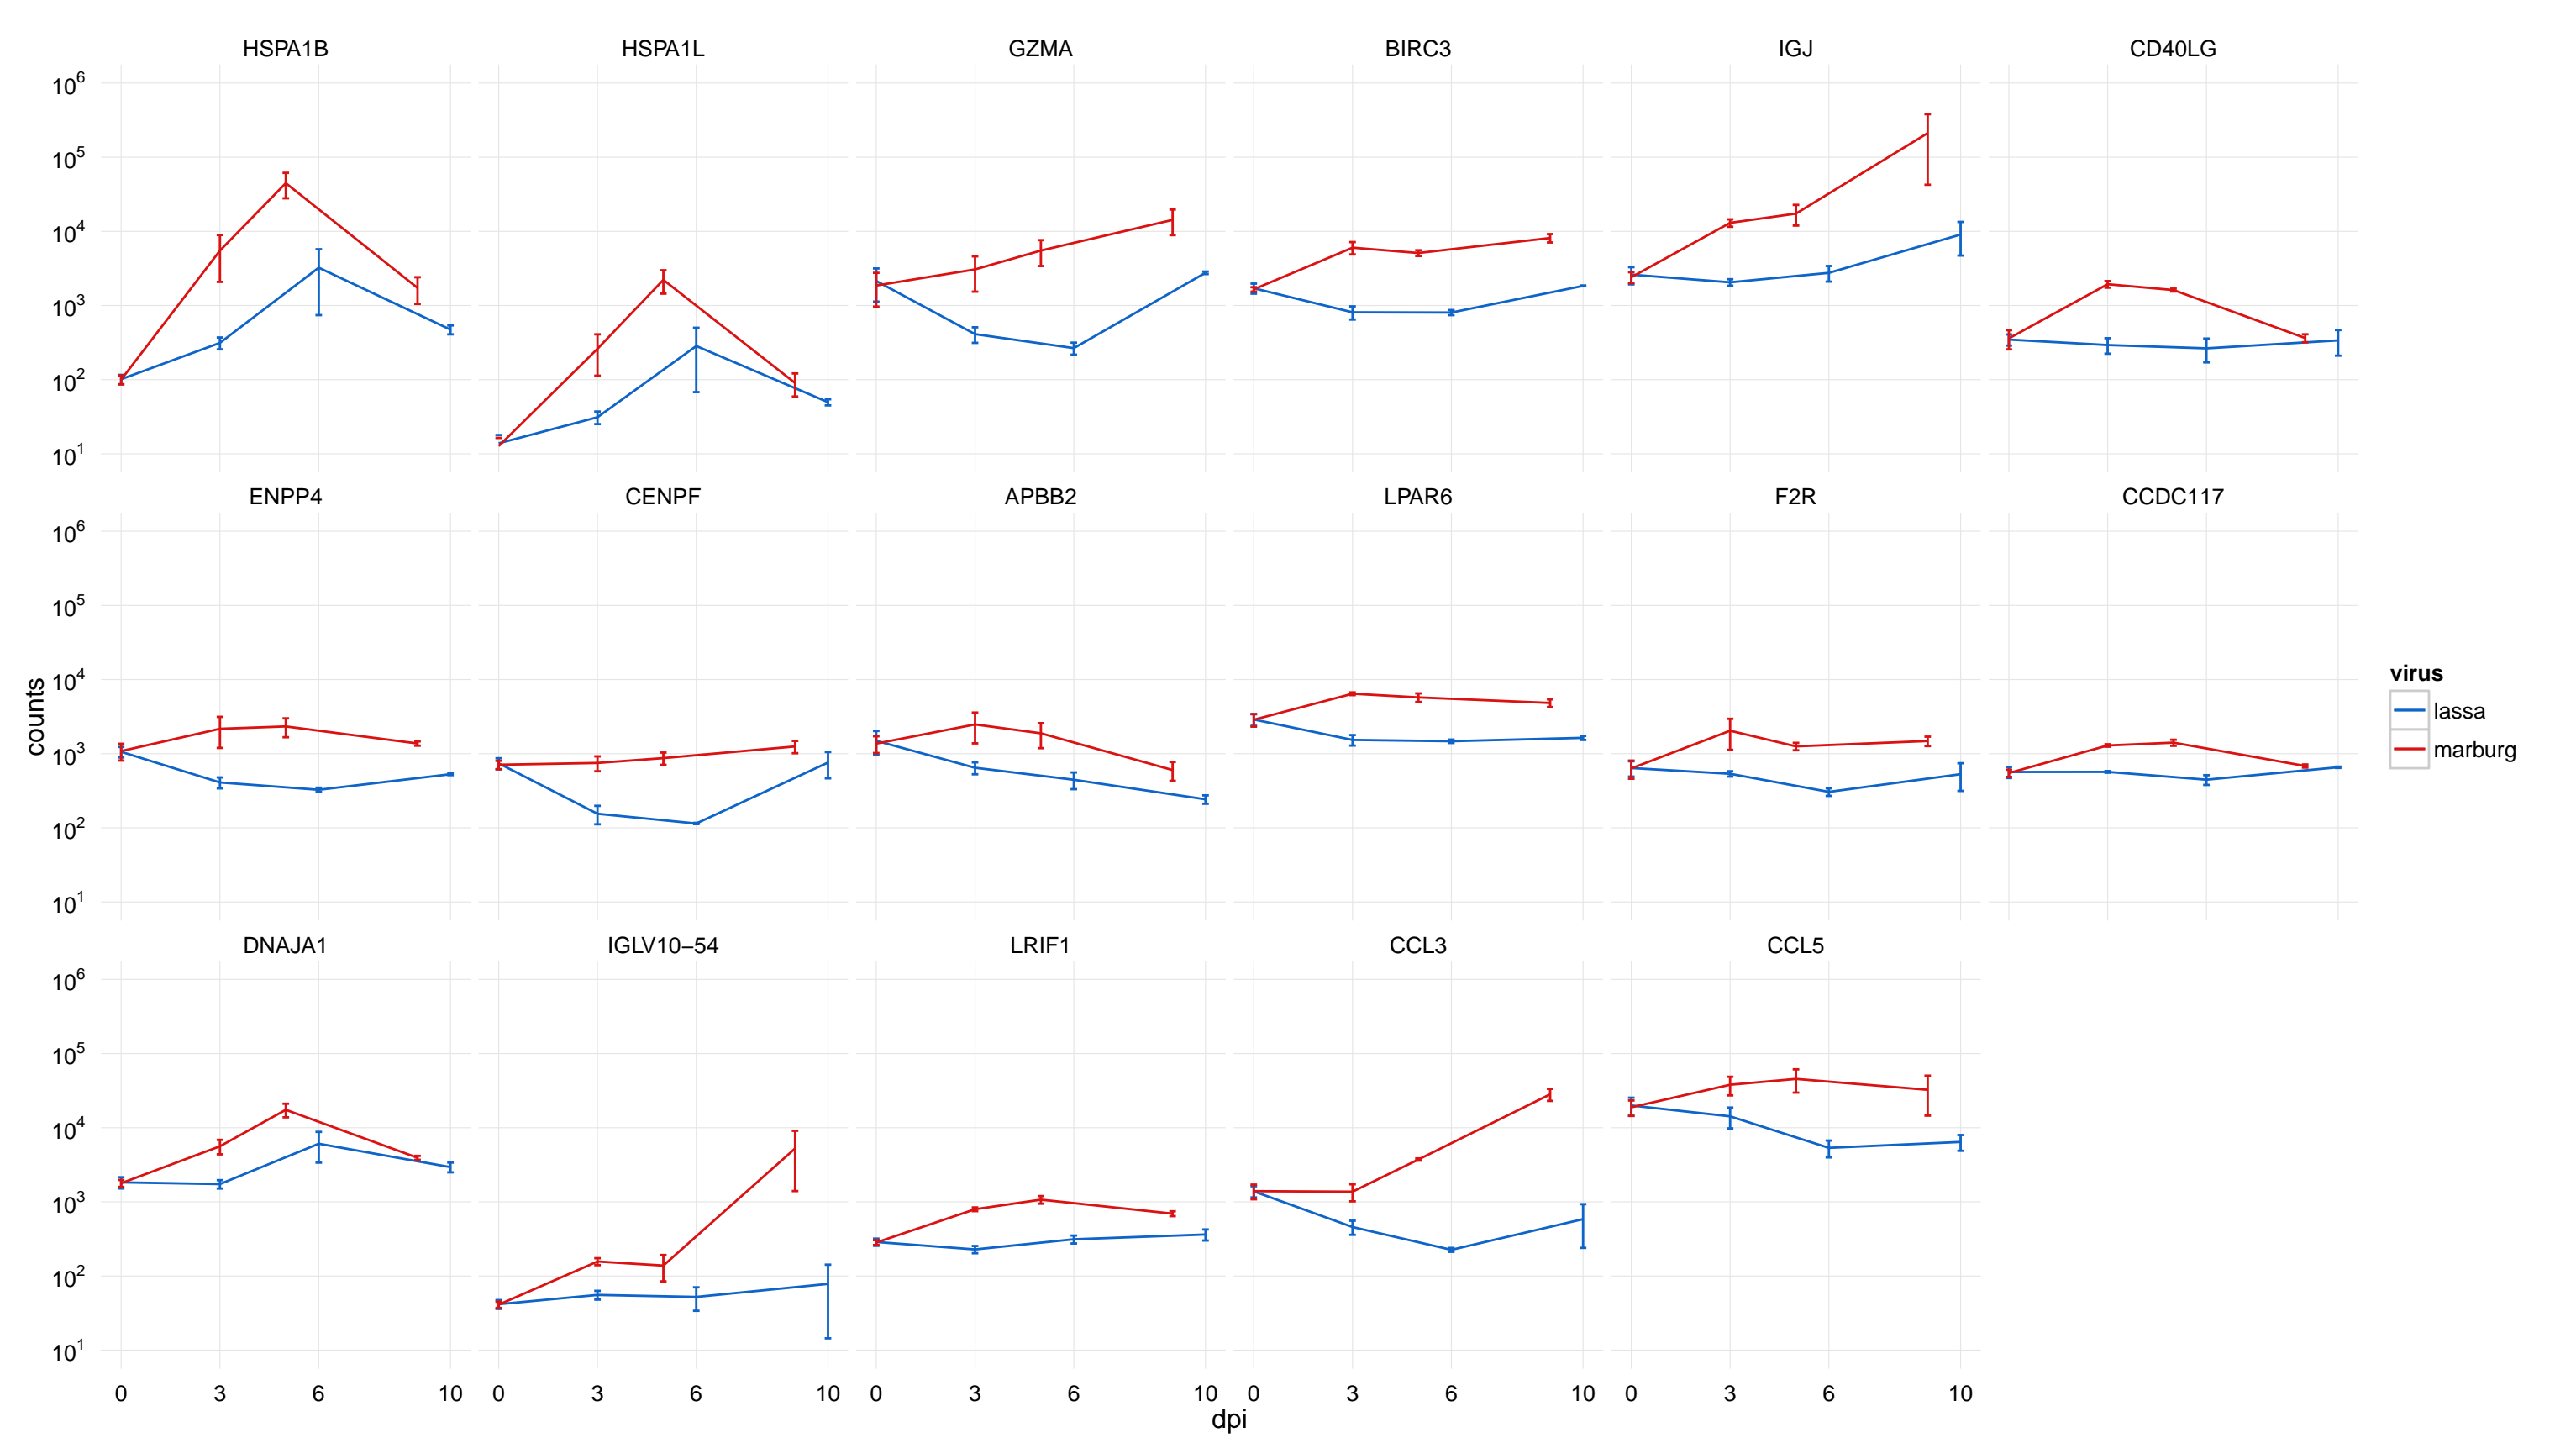

Supplement: 12864_2014_6648_MOESM3_ESM.pdf [file 12864_2014_6648_MOESM3_ESM.pdf]
